# Supplementary material for: Updates and evaluation of NOAA’s online-coupled air quality model version 7 (AQMv7) within the Unified Forecast System
Source: Copernicus journal article supplement (doi:10.5194/gmd-2024-107), 2024-06-26
Supplement: Supplementary file 1 [file gmd-2024-107-supplement.pdf]

*Supplement of*

**Updates and evaluation of NOAA's online-coupled air quality model version 7 (AQMv7) within the Unified Forecast System**

Wei Li<sup>1,2</sup>, Beiming Tang<sup>1,2</sup>, Patrick C. Campbell<sup>1,2</sup>, Youhua Tang<sup>1,2</sup>, Barry Baker<sup>1</sup>, Zachary Moon<sup>1,3</sup>, Daniel Tong<sup>1,2</sup>, Jianping Huang<sup>4</sup>, Kai Wang<sup>4,5</sup>, Ivanka Stajner<sup>4</sup>, Raffaele Montuoro<sup>4</sup>, Robert C. Gilliam<sup>6</sup>

<sup>1</sup>Air Resources Laboratory, NOAA/OAR, College Park, MD, USA

<sup>2</sup>Cooperative Institute for Satellite Earth System Studies, George Mason University, Fairfax, VA, USA

<sup>3</sup>Earth Resources Technology, Inc.

<sup>4</sup>Environmental Modeling Center, NOAA/NWS/NCEP, College Park, MD, USA

<sup>5</sup>Lynker, Leesburg, VA, USA

<sup>6</sup>US Environmental Protection Agency, Research Triangle Park, NC, USA

*Corresponding author:* Wei Li (wli31@gmu.edu)

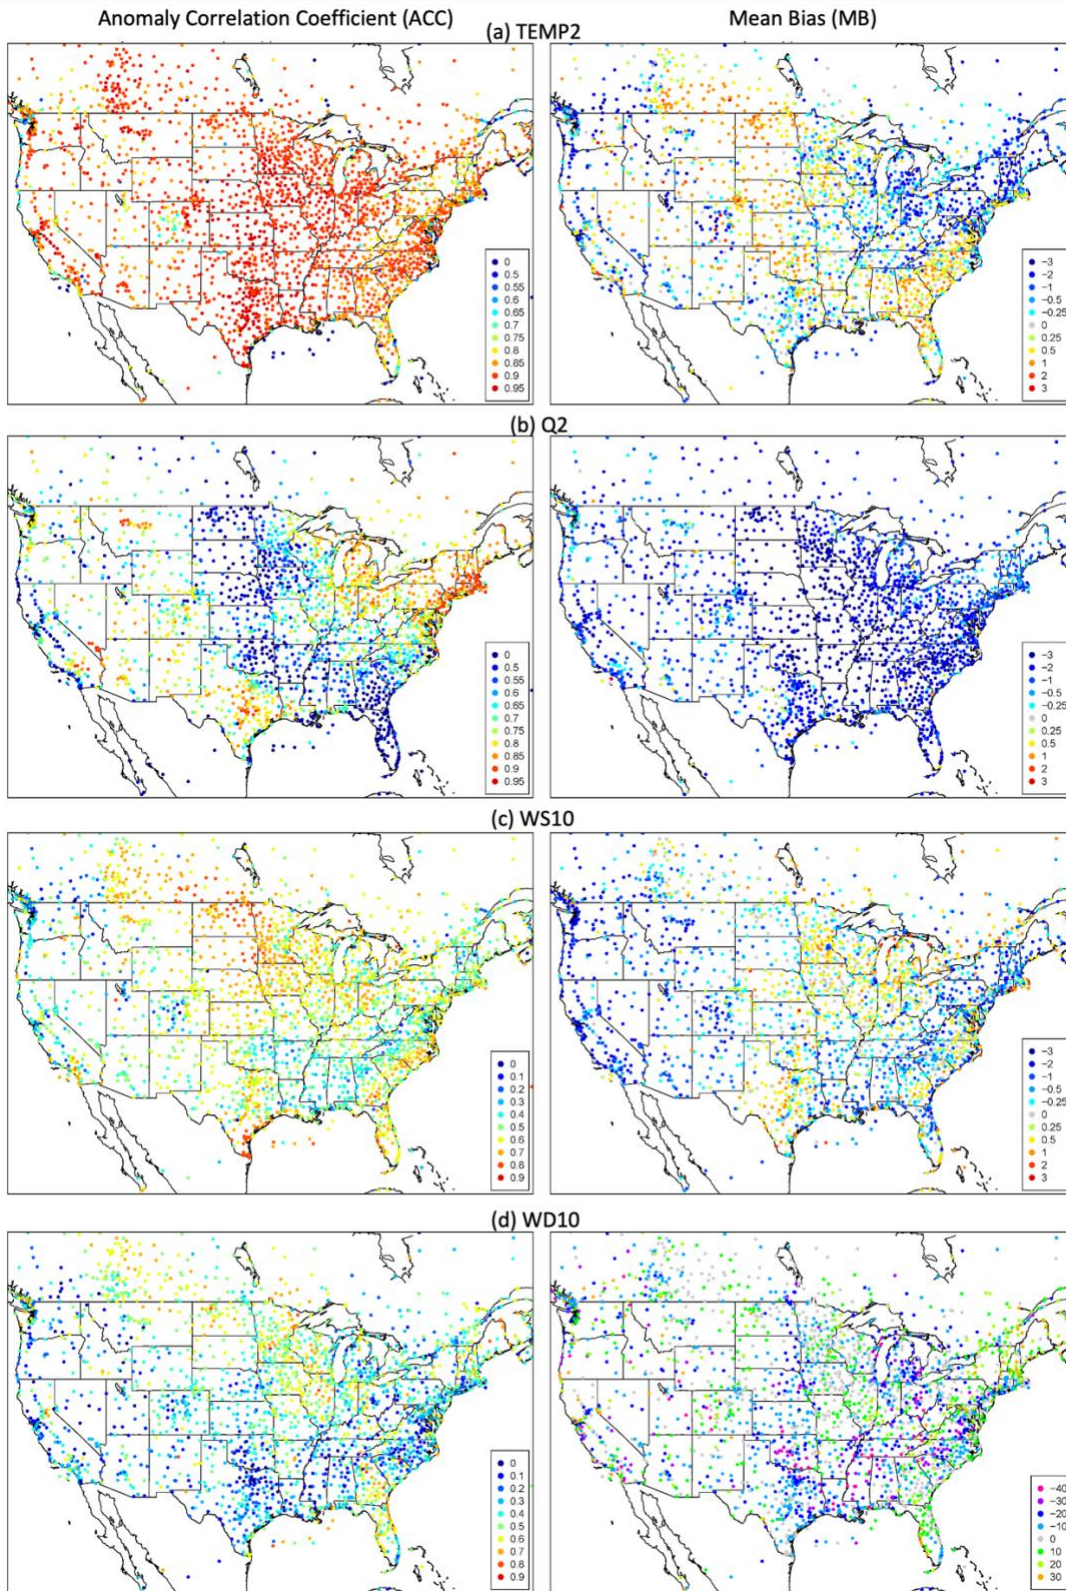

**Figure S1: Anomaly correlation coefficient (ACC; left column) and mean bias (MB) between GFSv16.3 simulated and observed TEMP2 (a; °C), Q2(b; g/kg), WS10 (c; m/s), and WD10 (d; degree) at the surface.**

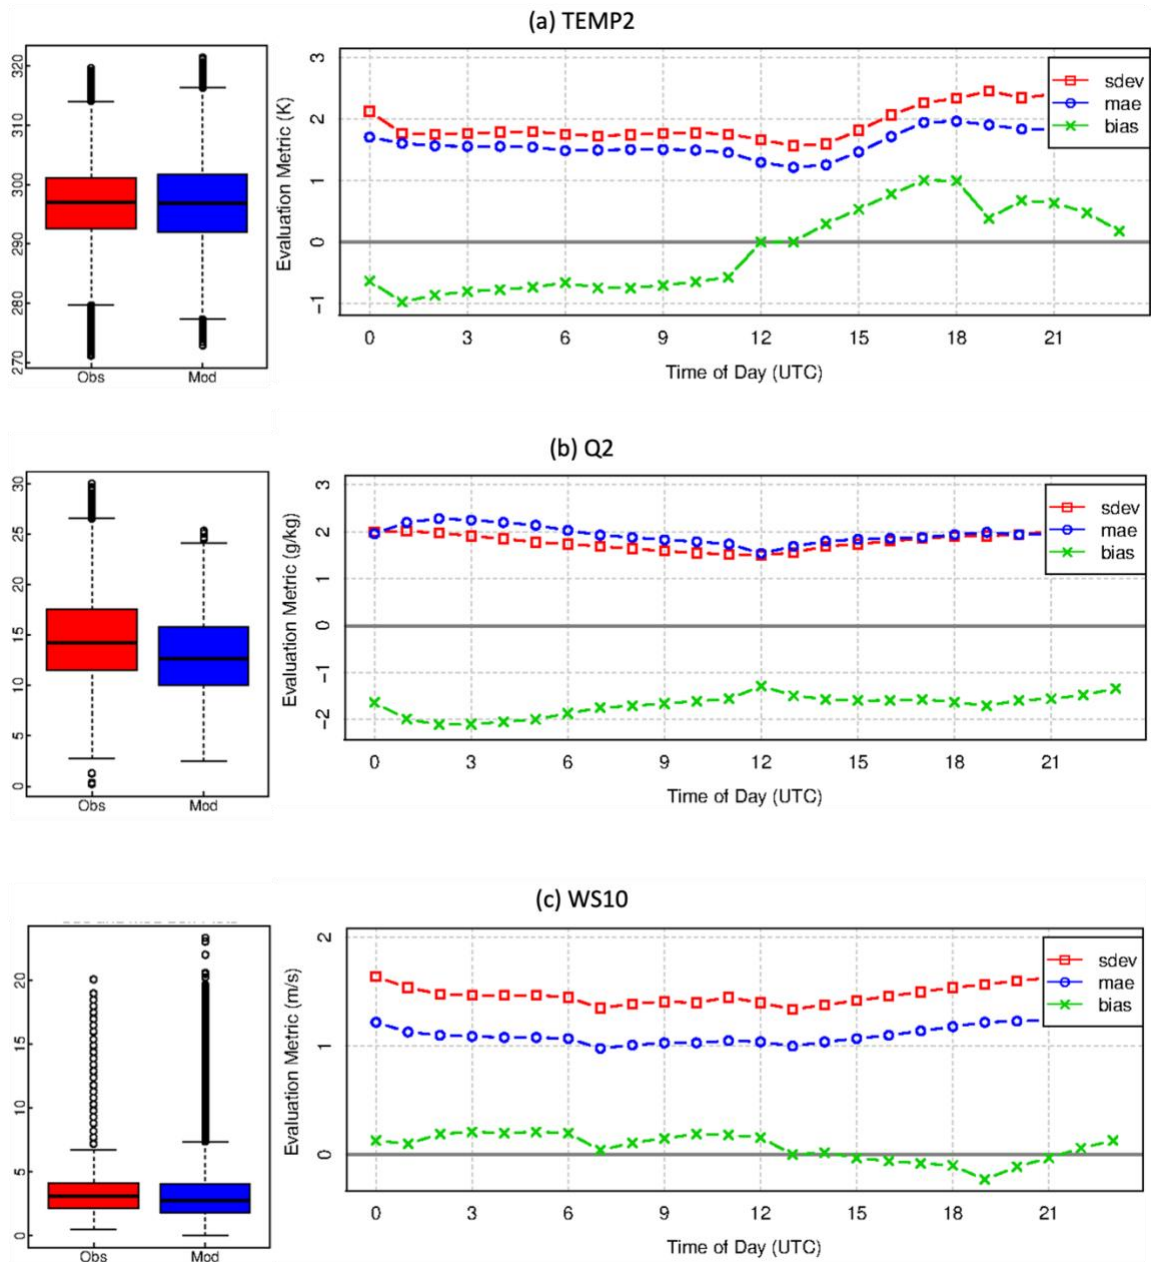

**Figure S2: Boxplot (left column) and diurnal changes in three evaluation statistics (right column), including standard deviation (sdev; red), mean absolute error (mae; blue), and mean bias (gree), between GFSv16.3 simulated and observed TEMP2 (a; K), Q2(b; g/kg), and WS10 (c; m/s) at the surface across the eastern US (100°W east).**

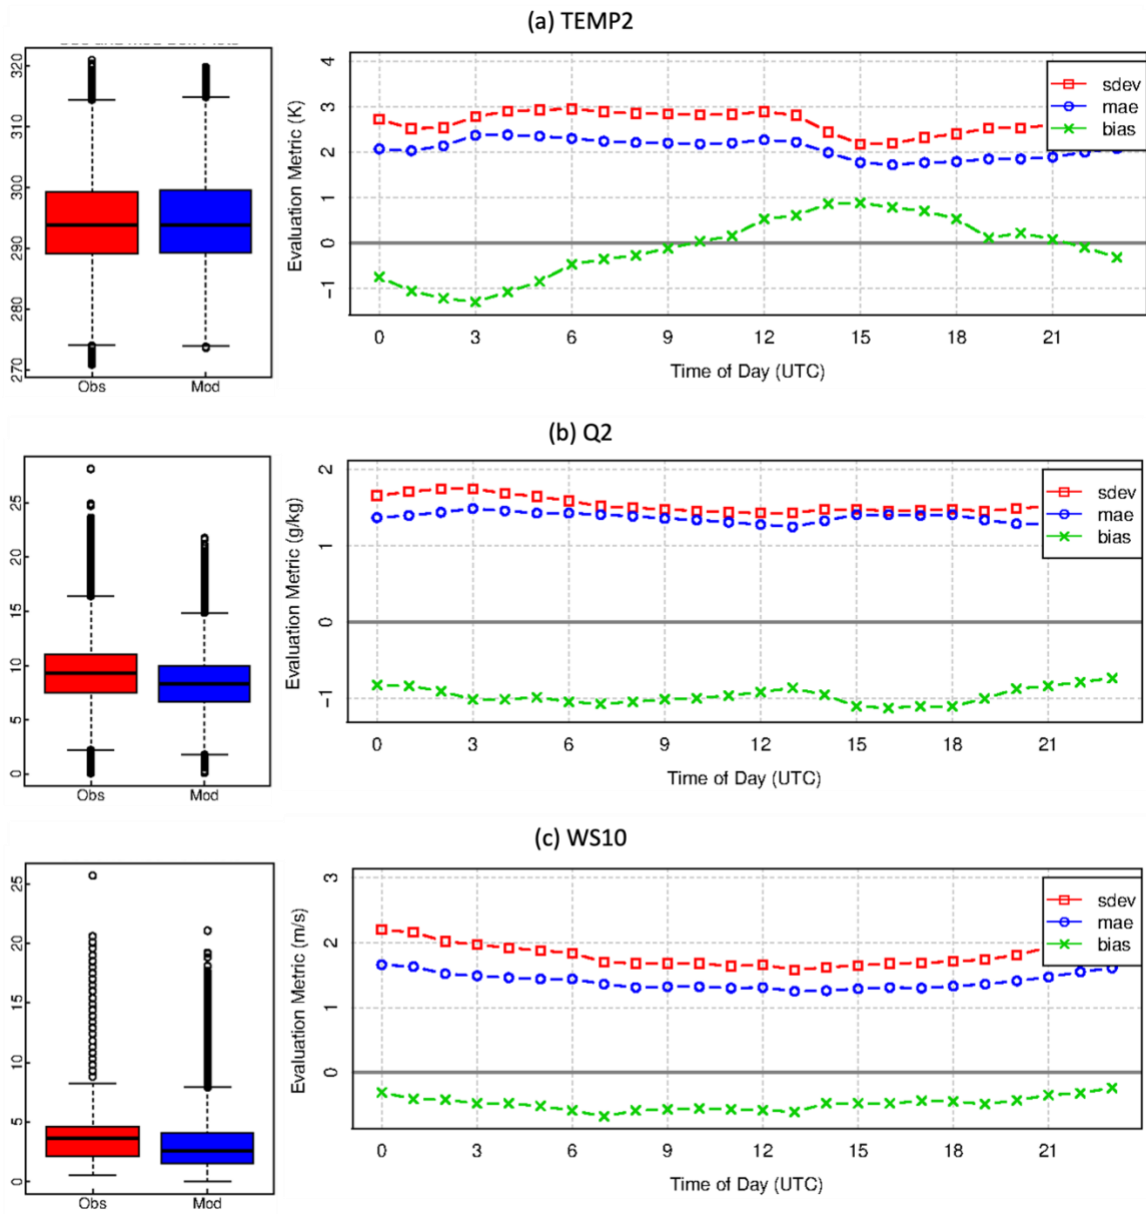

Figure S3: Same as Figure S2 but for the western US (100°W west).

**Table S1: Evaluation statistics of TEMP2 (K), Q2(g/kg) and WS10 (m/s) from the GFSv16.3 simulation at the surface in August 2023.**

| Region                     | Variab<br>les | CORR | ACC  | MB    | NMB<br>(%) | MAE  | NME<br>(%) | RMSE |
|----------------------------|---------------|------|------|-------|------------|------|------------|------|
| CONUS                      | TEMP2         | 0.95 | 0.95 | -0.03 | -0.06      | 1.73 | 3.27       | 2.29 |
|                            | Q2            | 0.92 | 0.87 | -1.41 | -4.72      | 1.70 | 5.66       | 2.25 |
|                            | WS10          | 0.65 | 0.56 | -0.15 | -0.57      | 1.24 | 4.72       | 1.68 |
| Eastern US<br>(100°W east) | TEMP2         | 0.95 | 0.95 | 0     | 0          | 1.60 | 3.19       | 2.08 |
|                            | Q2            | 0.89 | 0.81 | -1.65 | -5.55      | 1.91 | 6.40       | 2.45 |
|                            | WS10          | 0.63 | 0.54 | 0.05  | 0.19       | 1.12 | 4.78       | 1.50 |
| Western US<br>(100°W west) | TEMP2         | 0.93 | 0.93 | 0.02  | 0.06       | 2.07 | 4.12       | 2.76 |
|                            | Q2            | 0.83 | 0.77 | -0.98 | -3.48      | 1.37 | 4.87       | 1.83 |
|                            | WS10          | 0.63 | 0.54 | -0.48 | -1.86      | 1.41 | 5.47       | 1.89 |

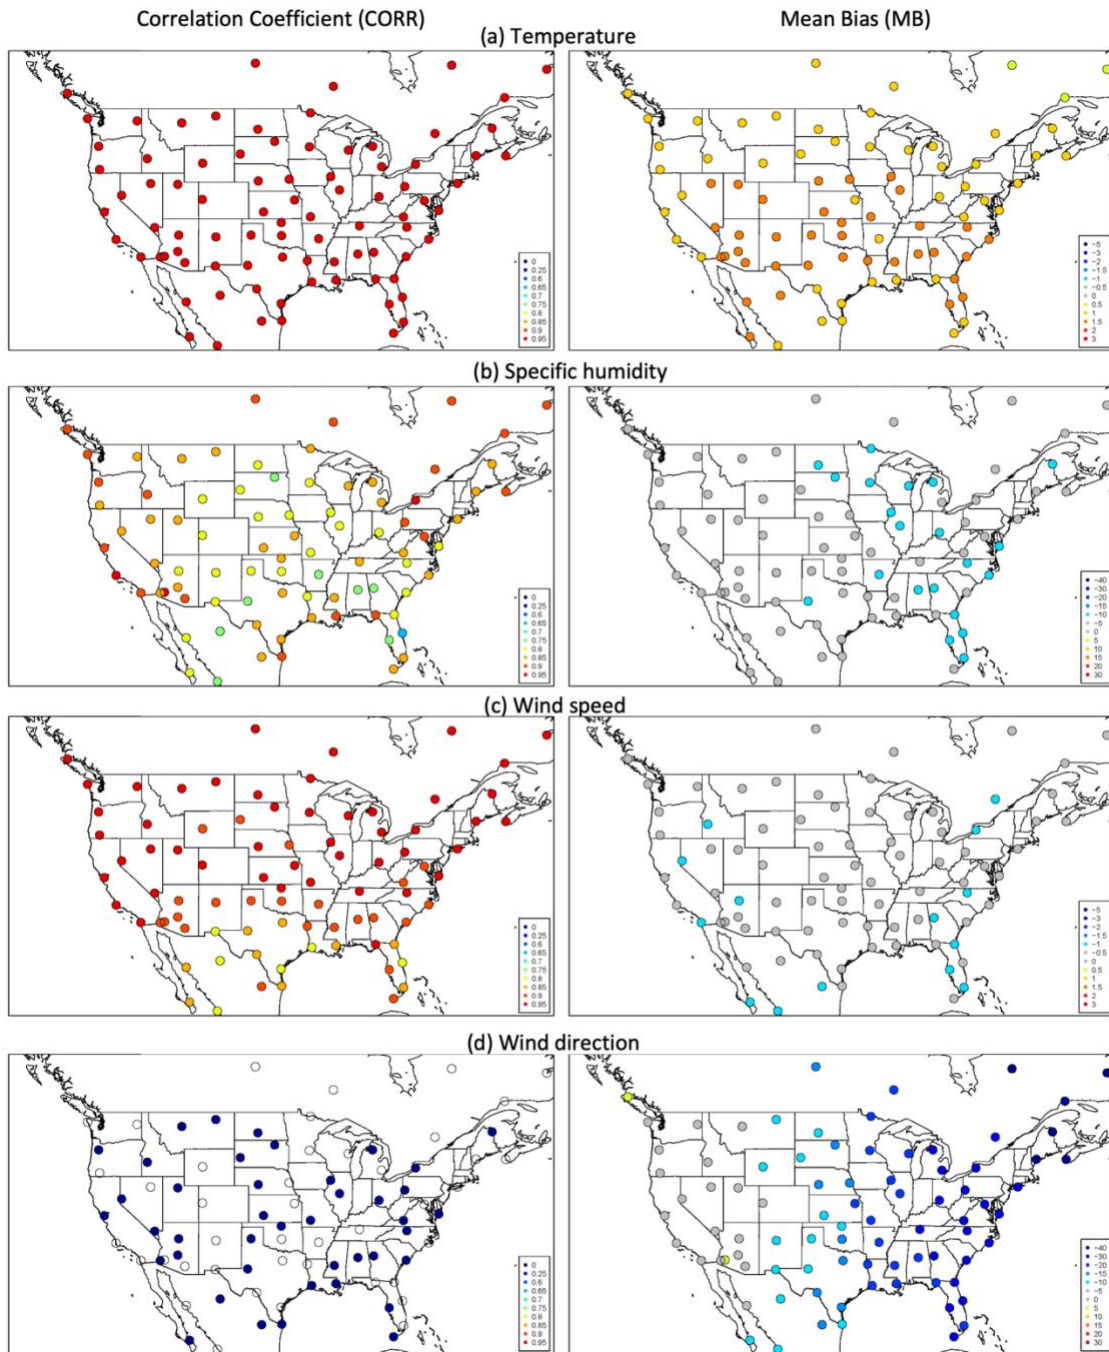

**Figure S4: Correlation coefficient (CORR; left column) and mean bias (MB) between GFSv16.3 simulated and observed vertical distributions of temperature (a; °C), specific humidity (b; g/kg), wind speed (c; m/s), and wind direction (d; degree).**

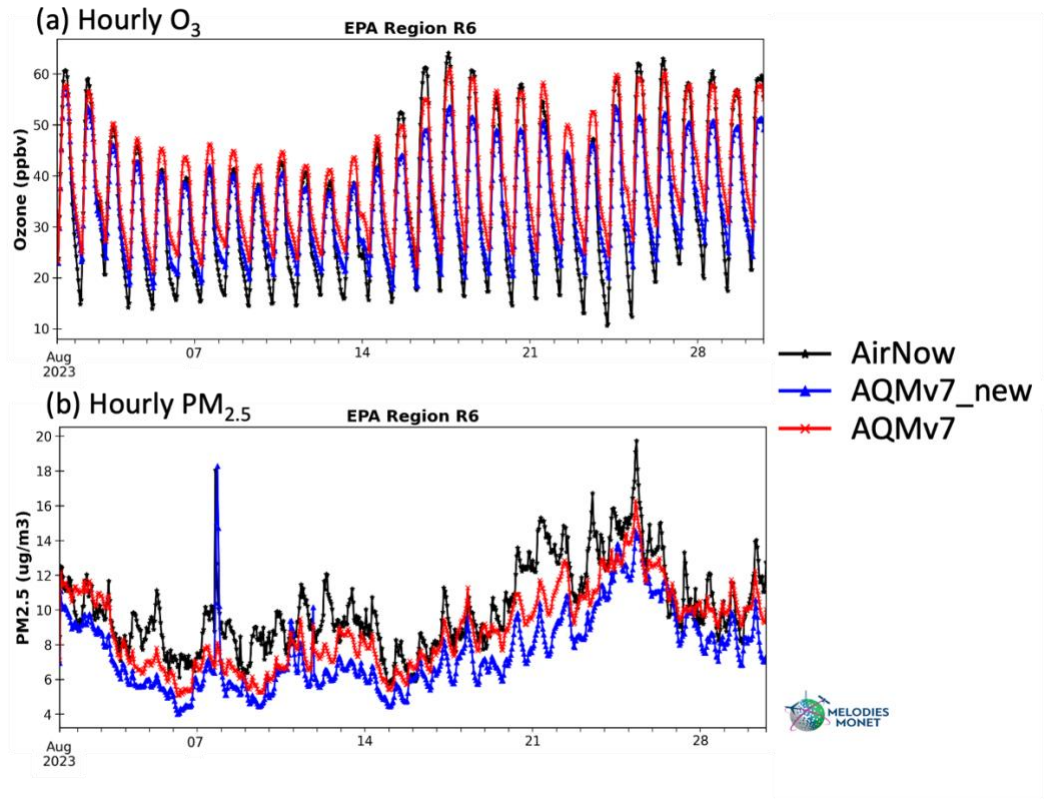

Figure S5: Hourly time series of O<sub>3</sub> and PM<sub>2.5</sub> average over Region 6.

**Table S2: MDA8 O<sub>3</sub> evaluation statistics of the AQMv7 and AQMv7\_new simulations against the AirNow network in the CONUS and different regions in August 2023. The bold numbers in AQMv7\_new indicates an improvement relative to those in AQMv7.**

| Region                          | Model     | MB (ppb)    | NMB (%)      | MdnB (ppb)   | NMdnB (%)    | R <sup>2</sup> | RMSE (ppb)  | IOA         |
|---------------------------------|-----------|-------------|--------------|--------------|--------------|----------------|-------------|-------------|
| CONUS                           | AQMv7     | 4.99        | 11.44        | 4.79         | 11.15        | 0.52           | 10.18       | 0.80        |
|                                 | AQMv7_new | <b>1.37</b> | <b>3.15</b>  | <b>1.04</b>  | <b>2.41</b>  | 0.50           | <b>9.13</b> | <b>0.83</b> |
| Region 1 (northeast)            | AQMv7     | 6.68        | 17.91        | 5.95         | 16.26        | 0.45           | 10.08       | 0.73        |
|                                 | AQMv7_new | <b>4.14</b> | <b>11.09</b> | <b>3.56</b>  | <b>9.72</b>  | <b>0.47</b>    | <b>8.43</b> | <b>0.79</b> |
| Region 2 (NY-NJ)                | AQMv7     | 7.45        | 18.56        | 6.33         | 15.98        | 0.47           | 10.97       | 0.73        |
|                                 | AQMv7_new | <b>4.98</b> | <b>12.40</b> | <b>3.76</b>  | <b>9.50</b>  | 0.46           | <b>9.54</b> | <b>0.77</b> |
| Region 3 (mid-Atlantic)         | AQMv7     | 7.08        | 16.16        | 7.09         | 16.24        | 0.40           | 10.18       | 0.68        |
|                                 | AQMv7_new | <b>2.60</b> | <b>5.93</b>  | <b>2.40</b>  | <b>5.51</b>  | 0.39           | <b>7.52</b> | <b>0.77</b> |
| Region 4 (southeast)            | AQMv7     | 9.32        | 22.74        | 9.16         | 22.34        | 0.58           | 11.53       | 0.71        |
|                                 | AQMv7_new | <b>4.39</b> | <b>10.71</b> | <b>4.18</b>  | <b>10.20</b> | 0.54           | <b>8.33</b> | <b>0.80</b> |
| Region 5 (upper Midwest)        | AQMv7     | 5.27        | 12.21        | 4.75         | 11.14        | 0.45           | 9.72        | 0.76        |
|                                 | AQMv7_new | <b>1.14</b> | <b>2.64</b>  | <b>0.52</b>  | <b>1.22</b>  | <b>0.49</b>    | <b>7.63</b> | <b>0.83</b> |
| Region 6 (south)                | AQMv7     | 1.25        | 2.52         | 1.13         | 2.23         | 0.66           | 8.55        | 0.86        |
|                                 | AQMv7_new | -4.64       | -9.35        | -4.42        | -8.74        | 0.66           | 9.86        | 0.82        |
| Region 7 (central Great Plain)  | AQMv7     | 5.82        | 12.95        | 4.98         | 11.24        | 0.32           | 9.82        | 0.68        |
|                                 | AQMv7_new | <b>0.53</b> | <b>1.17</b>  | <b>-0.30</b> | <b>-0.67</b> | 0.30           | <b>7.69</b> | <b>0.73</b> |
| Region 8 (northern Great Plain) | AQMv7     | 0.59        | 1.18         | 0.19         | 0.38         | 0.28           | 8.40        | 0.69        |
|                                 | AQMv7_new | -3.35       | -6.72        | -4.06        | -8.13        | <b>0.35</b>    | 8.59        | <b>0.71</b> |
| Region 9 (southwest)            | AQMv7     | 3.00        | 6.02         | 2.59         | 5.18         | 0.58           | 9.76        | 0.84        |
|                                 | AQMv7_new | <b>0.96</b> | <b>1.93</b>  | <b>0.73</b>  | <b>1.45</b>  | <b>0.59</b>    | <b>9.50</b> | <b>0.87</b> |
| Region 10 (northwest)           | AQMv7     | 3.81        | 9.06         | 3.07         | 7.35         | 0.56           | 9.53        | 0.84        |
|                                 | AQMv7_new | <b>2.51</b> | <b>5.96</b>  | <b>0.62</b>  | <b>1.49</b>  | 0.50           | 10.06       | 0.83        |



**Table S3: Same as Table S2 but for daily PM<sub>2.5</sub>.**

| Region                          | Model     | MB (ppb)     | NMB (%)      | MdnB (ppb)   | NMdnB (%)    | R <sup>2</sup> | RMSE (ppb)   | IOA         |
|---------------------------------|-----------|--------------|--------------|--------------|--------------|----------------|--------------|-------------|
| CONUS                           | AQMv7     | -0.09        | -0.84        | 0.67         | 8.34         | 0.16           | 22.34        | 0.55        |
|                                 | AQMv7_new | -1.47        | -12.94       | <b>-0.48</b> | <b>-5.97</b> | 0.16           | <b>21.91</b> | 0.55        |
| Region 1 (northeast)            | AQMv7     | 1.62         | 23.84        | 1.79         | 31.63        | 0.46           | 3.20         | 0.77        |
|                                 | AQMv7_new | <b>-0.01</b> | <b>-0.12</b> | <b>0.23</b>  | <b>4.12</b>  | 0.37           | <b>3.03</b>  | 0.76        |
| Region 2 (NY-NJ)                | AQMv7     | 2.75         | 32.44        | 2.59         | 34.58        | 0.46           | 4.23         | 0.75        |
|                                 | AQMv7_new | <b>1.71</b>  | <b>20.25</b> | <b>1.57</b>  | <b>20.92</b> | 0.40           | <b>4.16</b>  | <b>0.76</b> |
| Region 3 (mid-Atlantic)         | AQMv7     | 2.47         | 26.41        | 2.10         | 25.44        | 0.42           | 5.12         | 0.73        |
|                                 | AQMv7_new | <b>0.95</b>  | <b>10.20</b> | <b>0.44</b>  | <b>5.39</b>  | 0.41           | <b>4.65</b>  | <b>0.77</b> |
| Region 4 (southeast)            | AQMv7     | 0.55         | 5.60         | 0.74         | 8.41         | 0.44           | 3.31         | 0.80        |
|                                 | AQMv7_new | -1.15        | -11.80       | -0.91        | -10.37       | 0.39           | 3.57         | 0.75        |
| Region 5 (upper Midwest)        | AQMv7     | 2.57         | 21.88        | 1.95         | 17.93        | 0.37           | 7.57         | 0.71        |
|                                 | AQMv7_new | <b>-0.54</b> | <b>-4.58</b> | <b>-0.42</b> | <b>-3.83</b> | 0.35           | <b>5.89</b>  | <b>0.76</b> |
| Region 6 (south)                | AQMv7     | -1.22        | -12.03       | -0.99        | -10.10       | 0.41           | 3.79         | 0.77        |
|                                 | AQMv7_new | -2.50        | -24.72       | -2.60        | -26.61       | 0.36           | 4.5          | 0.70        |
| Region 7 (central Great Plain)  | AQMv7     | 1.90         | 18.78        | 1.78         | 19.36        | 0.18           | 5.91         | 0.62        |
|                                 | AQMv7_new | <b>-0.34</b> | <b>-3.32</b> | <b>-0.12</b> | <b>-1.27</b> | 0.13           | <b>5.43</b>  | 0.61        |
| Region 8 (northern Great Plain) | AQMv7     | -1.32        | -15.29       | -0.62        | -9.95        | 0.13           | 9.18         | 0.56        |
|                                 | AQMv7_new | -1.51        | -17.50       | -0.79        | -12.68       | 0.11           | 9.55         | 0.53        |
| Region 9 (southwest)            | AQMv7     | -0.05        | -0.70        | 0.41         | 6.37         | 0.21           | 7.24         | 0.57        |
|                                 | AQMv7_new | -0.45        | -5.90        | <b>0.01</b>  | <b>0.12</b>  | 0.21           | 7.27         | 0.56        |
| Region 10 (northwest)           | AQMv7     | -3.56        | -20.70       | 0.16         | 2.24         | 0.20           | 37.60        | 0.61        |
|                                 | AQMv7_new | -4.35        | -25.30       | <b>-0.10</b> | <b>-1.41</b> | <b>0.21</b>    | <b>35.86</b> | <b>0.63</b> |
